# Supplementary material
Source: PubMed Central journal article supplement (PMC9308970)

### **Supplemental figure legends:**

#### **Supplemental figure 1: Individual peptide log<sub>2</sub>fc(PSM) for the ARVCF/p120-catenin orthogroup.**

**A.** Heatmap showing the peptides identified for the ARVCF/p120-catenin orthogroup. Peptides are on the y-axis and the associated protein is on the x-axis. Color represents the Log<sub>2</sub>fc(PSM) change comparing cdh3-GFP to the GFP-alone control.

#### **Supplemental figure 2: Superficial localization of Cdh3, vinculin, testin, and ARVCF.**

**A.** Image showing the superficial localization of cdh3-GFP (green) and actin (magenta). Cdh3 can be observed as plaques associated with protrusive structures, white arrowheads.

**B.** Image of the superficial localization of vinculin (green) which can be observed in protrusions and in plaque type structures, white arrowheads.

**C.** Image of the superficial localization of testin (green). Testin is present in protrusions and superficial plaque structures, white arrowheads.

**D.** Image of the superficial localization of ARVCF (green). ARVCF is observed in protrusions, white arrowheads, and is enriched at cell-cell contacts, yellow arrowheads.

#### **Supplemental figure 3: Explant buckling in the semi-rigid gel.**

**A.** Explant embedded in a semi-rigid gel converged mediolaterally in the first 2.5 hrs and buckled at 3 hr. Black outline, explant-gel interface. Dashed line, explant midline. White arrow, the direction of the out-of-plane buckling.

**B.** Outline of the explant during convergent extension. Black arrow, sudden change of the explant shape indicating a buckling happened.

#### **Supplemental figure 4:**

**A.** Graph showing the mean cross correlation between Cdh3 and actin at wildtype non-shortening junctions.

**A'.** Heatmap displaying the cross correlations for each individual wildtype non-shortening junctions.

## Arvcf and p120-catenin orthogroup

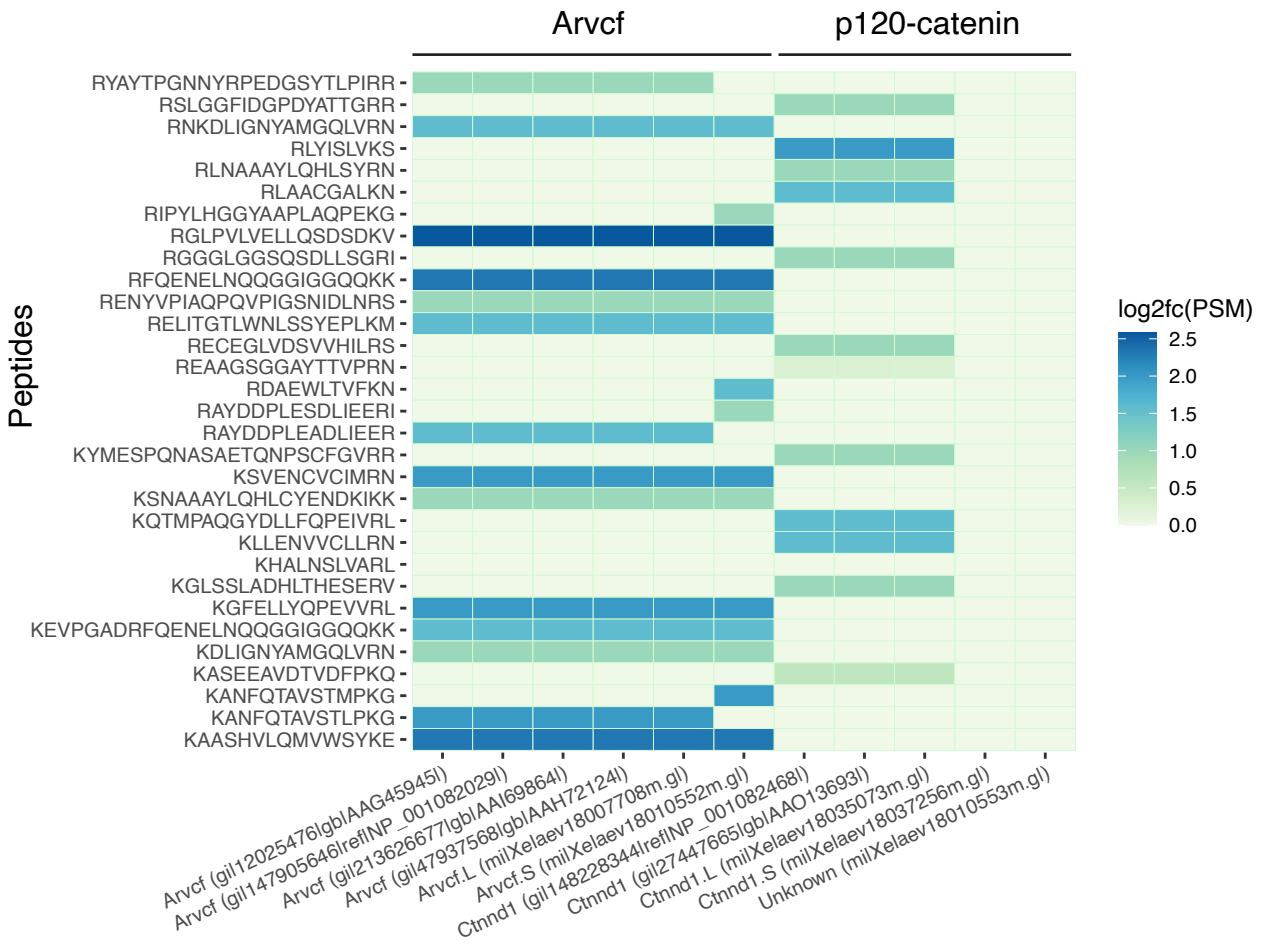

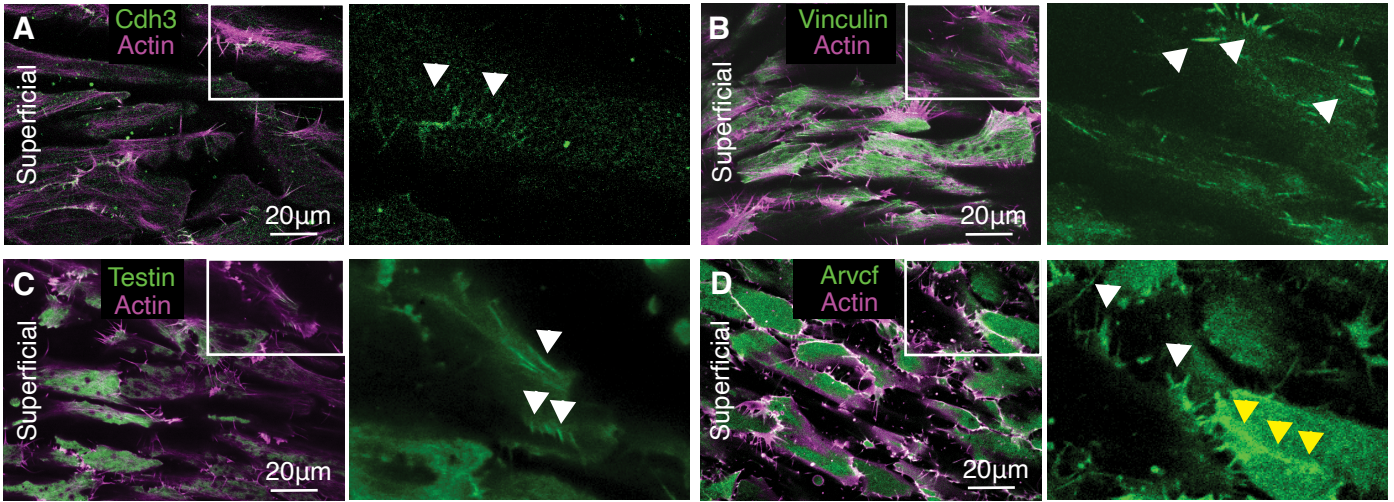

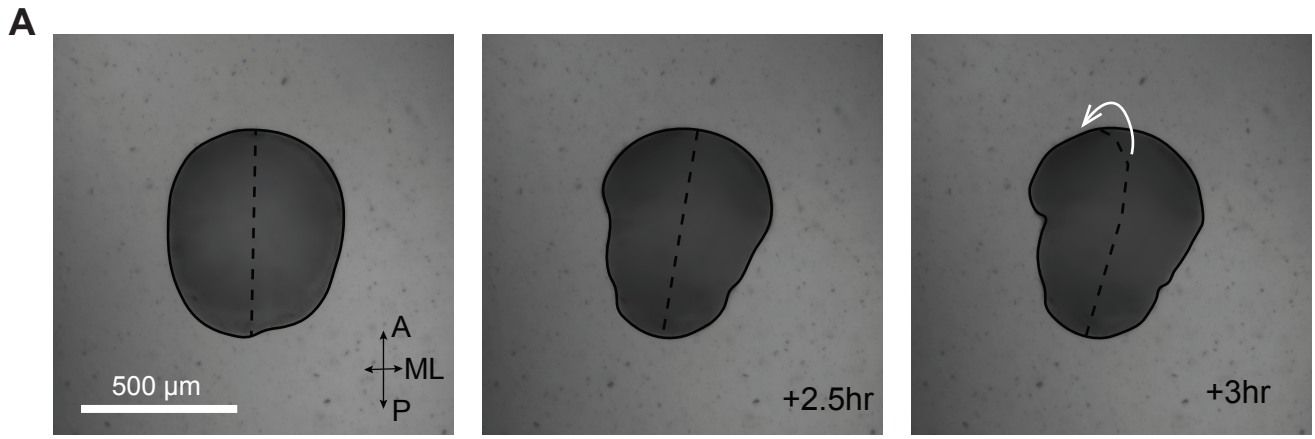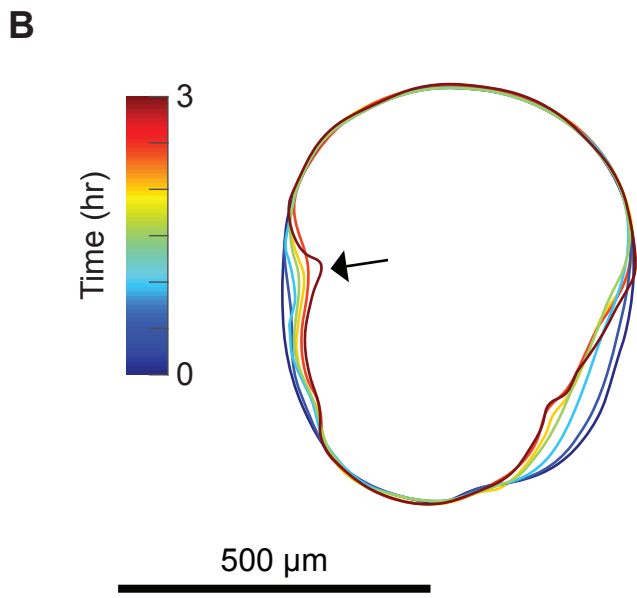

**A** non-shortening average cross correlation

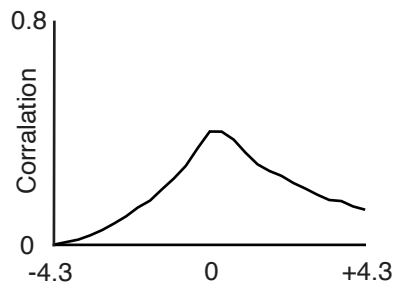

**A'** non-shorteningtotal cross correlation

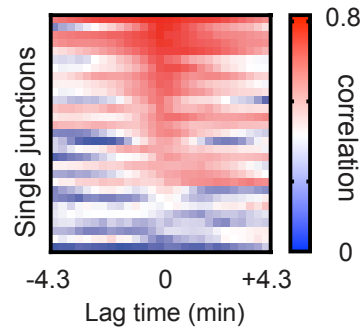

Supplement: NIHMS1818016-supplement-Supplemental_Figs_1-4.pdf [file NIHMS1818016-supplement-Supplemental_Figs_1-4.pdf]
